# Supplementary material for: Expanding the borononucleotide family: synthesis of borono-analogues of dCMP, dGMP and dAMP
Source: Royal Society of Chemistry journal article supplement (doi:10.1039/b912616c), 2009-01-01

## **Expanding the boronucleotide family : synthesis of borono-analogues of dCMP, dGMP and dAMP**

**Anthony R. Martin, Kishor Mohanan, Delphine Luvino, Nicolas Floquet, Carine Baraguey, Michael Smietana\* and Jean-Jacques Vasseur\***

|                                                       |         |
|-------------------------------------------------------|---------|
| NMR spectra of dCMP boronoisostere and its precursors | S2-S10  |
| NMR spectra of dGMP boronoisostere and its precursors | S11-S19 |
| NMR spectra of dAMP boronoisostere and its precursors | S20-S32 |

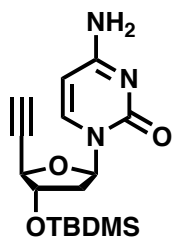

6

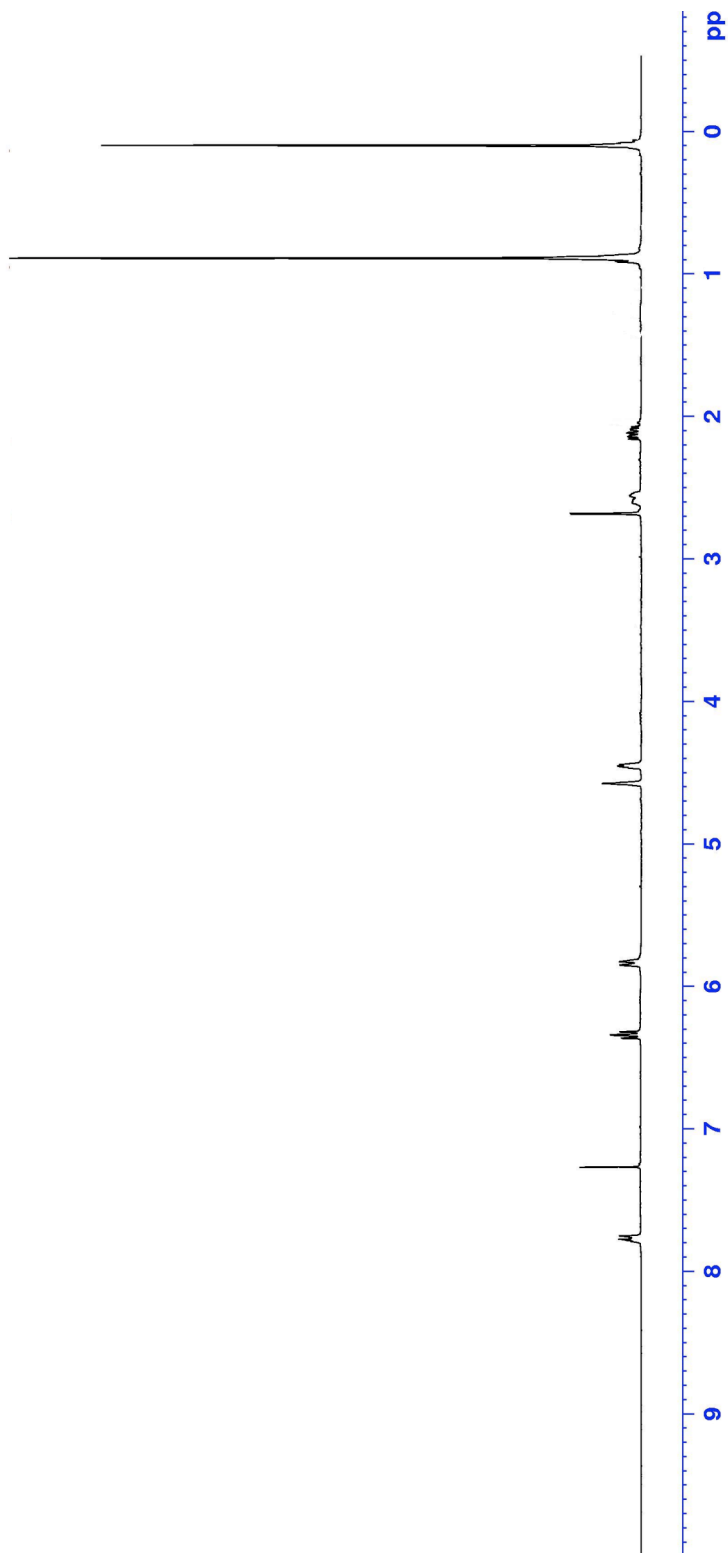

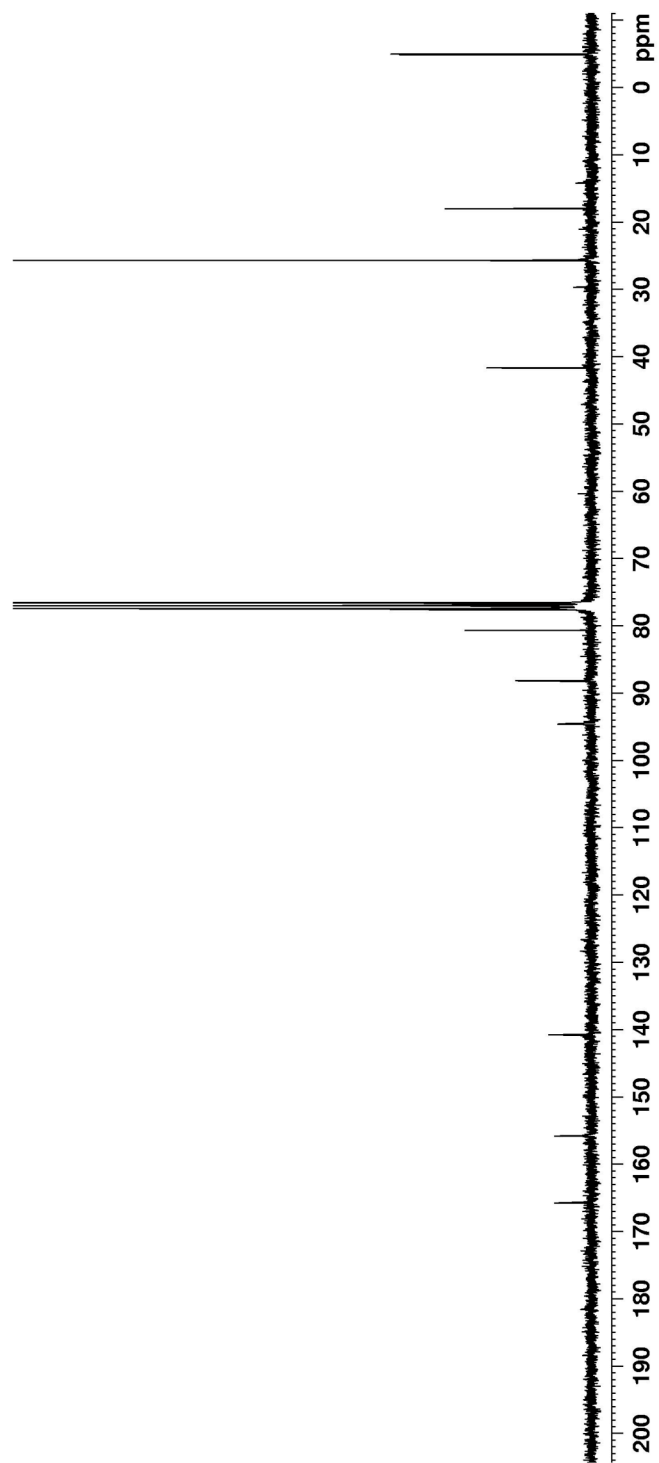

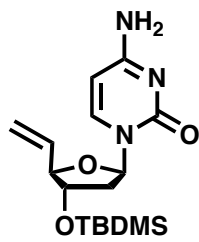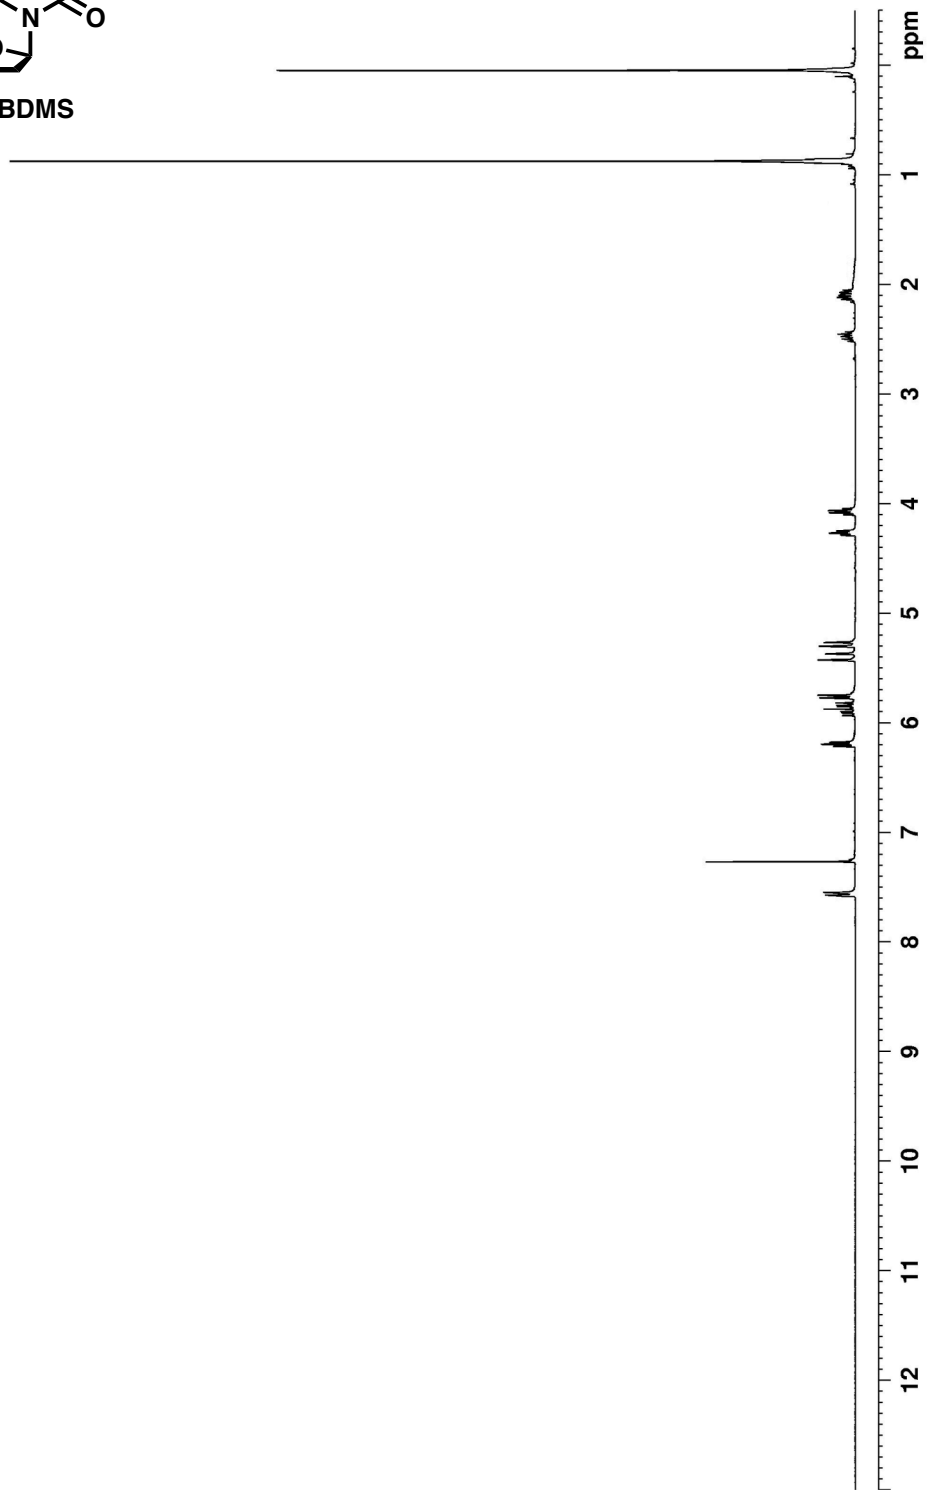

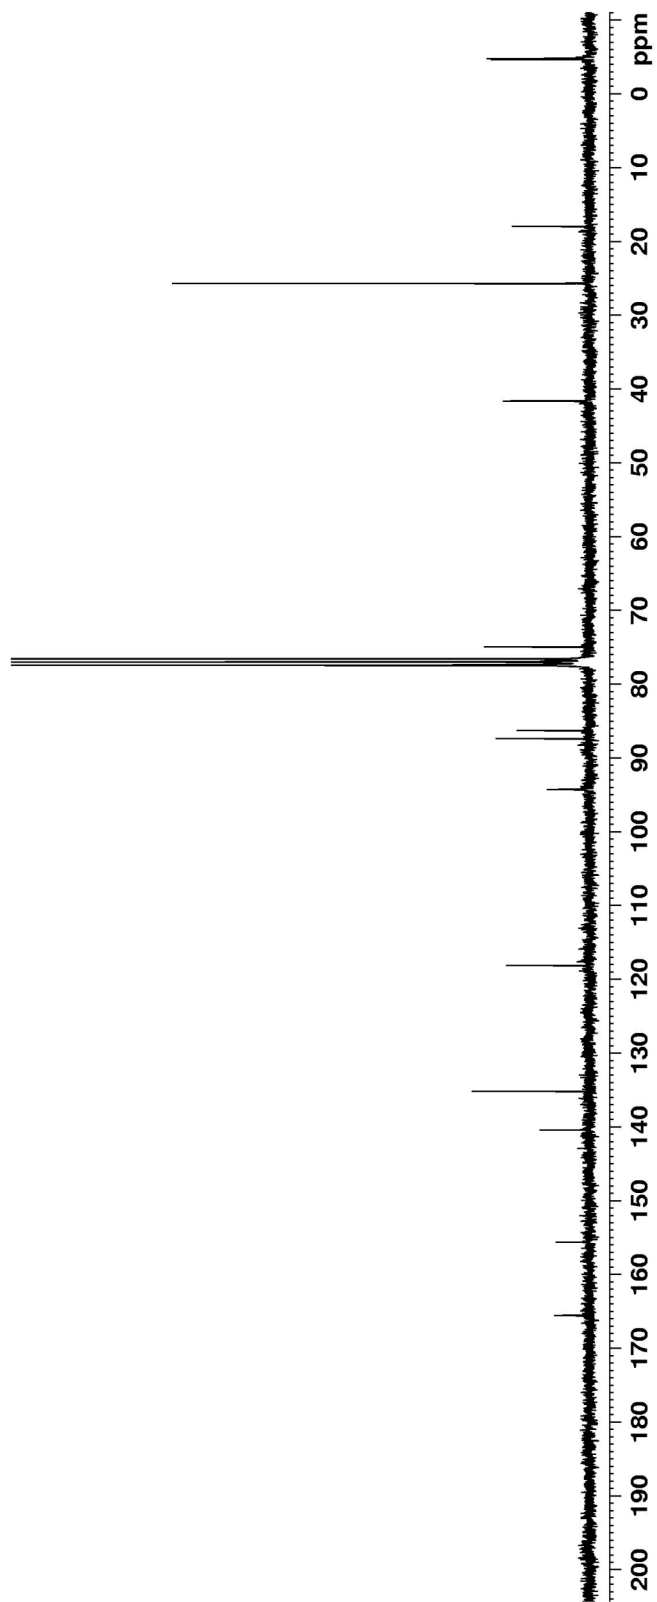

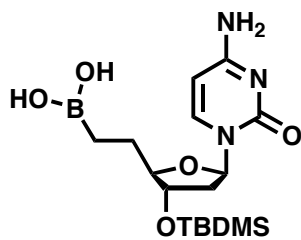

8

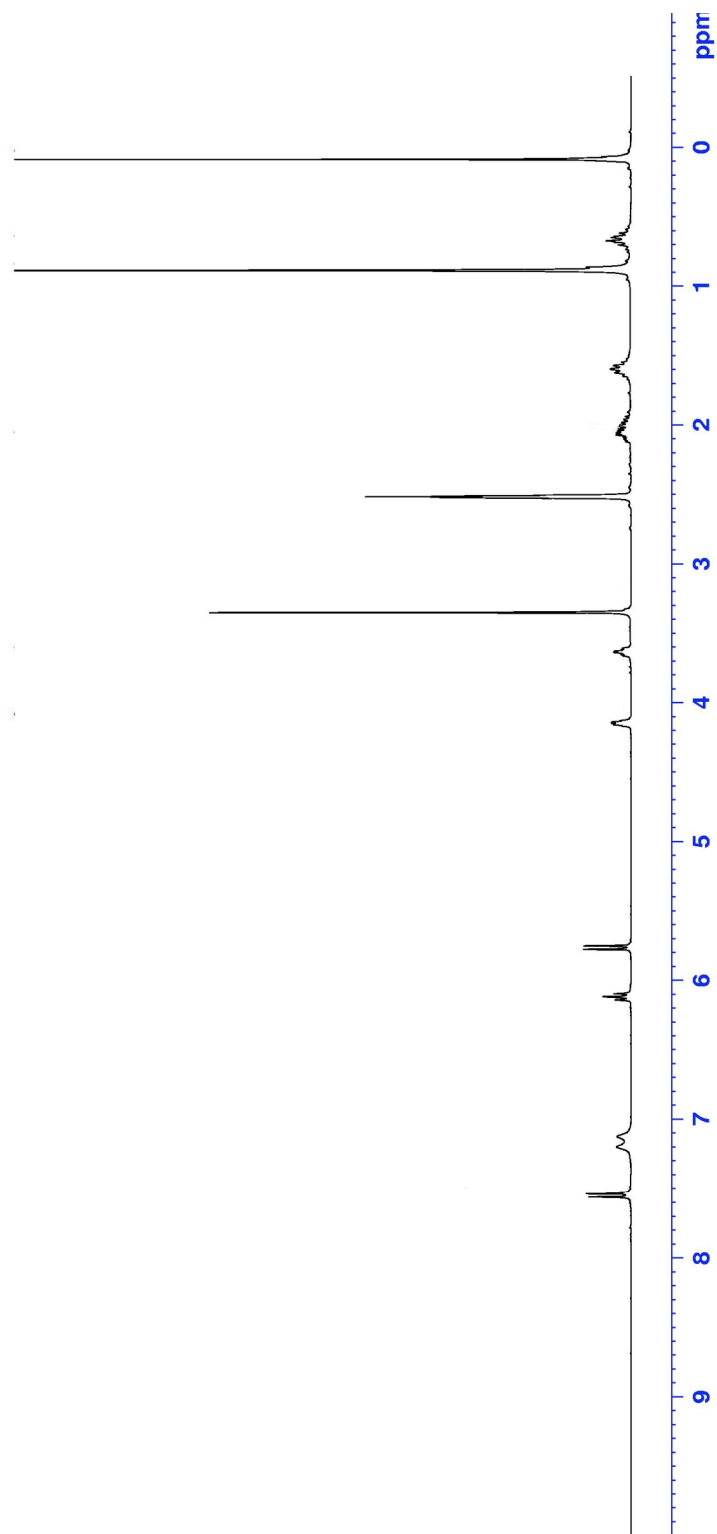

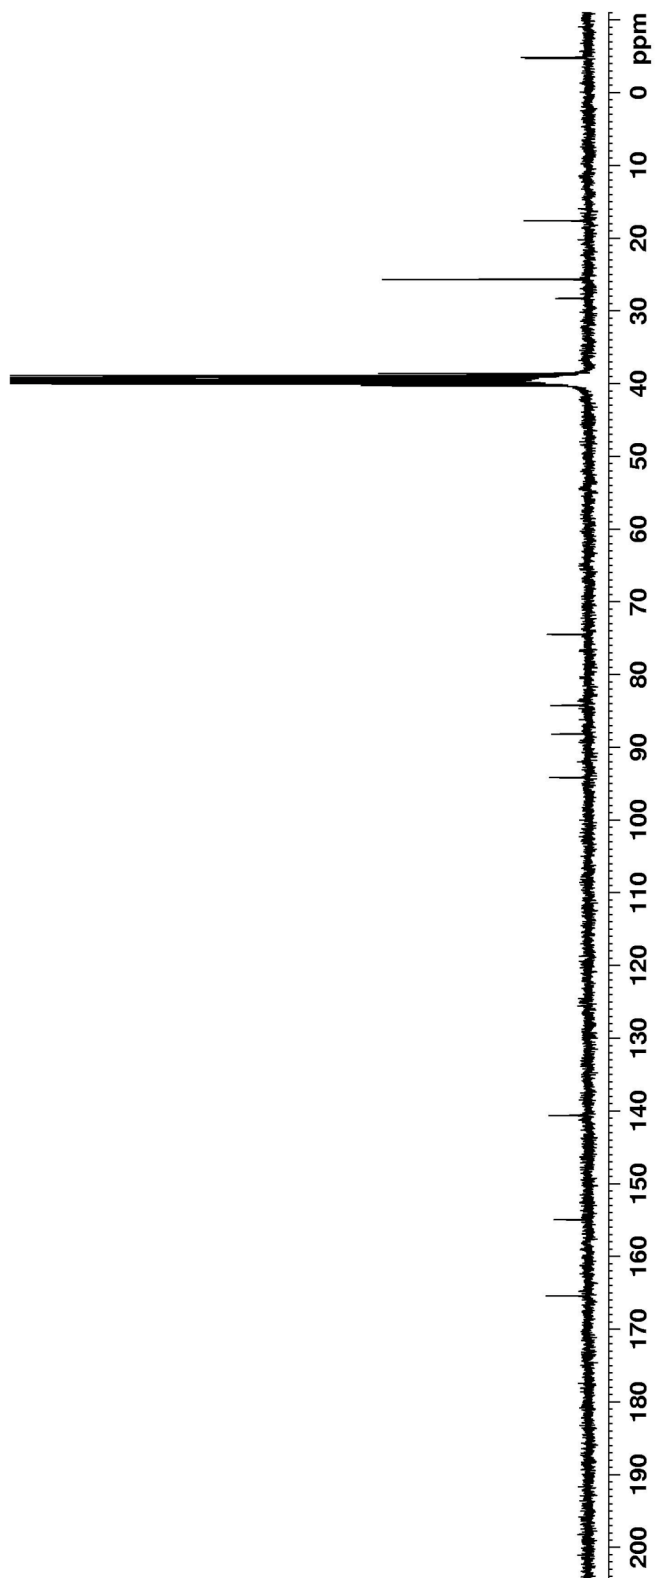

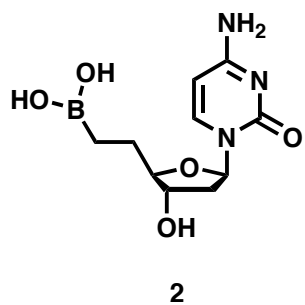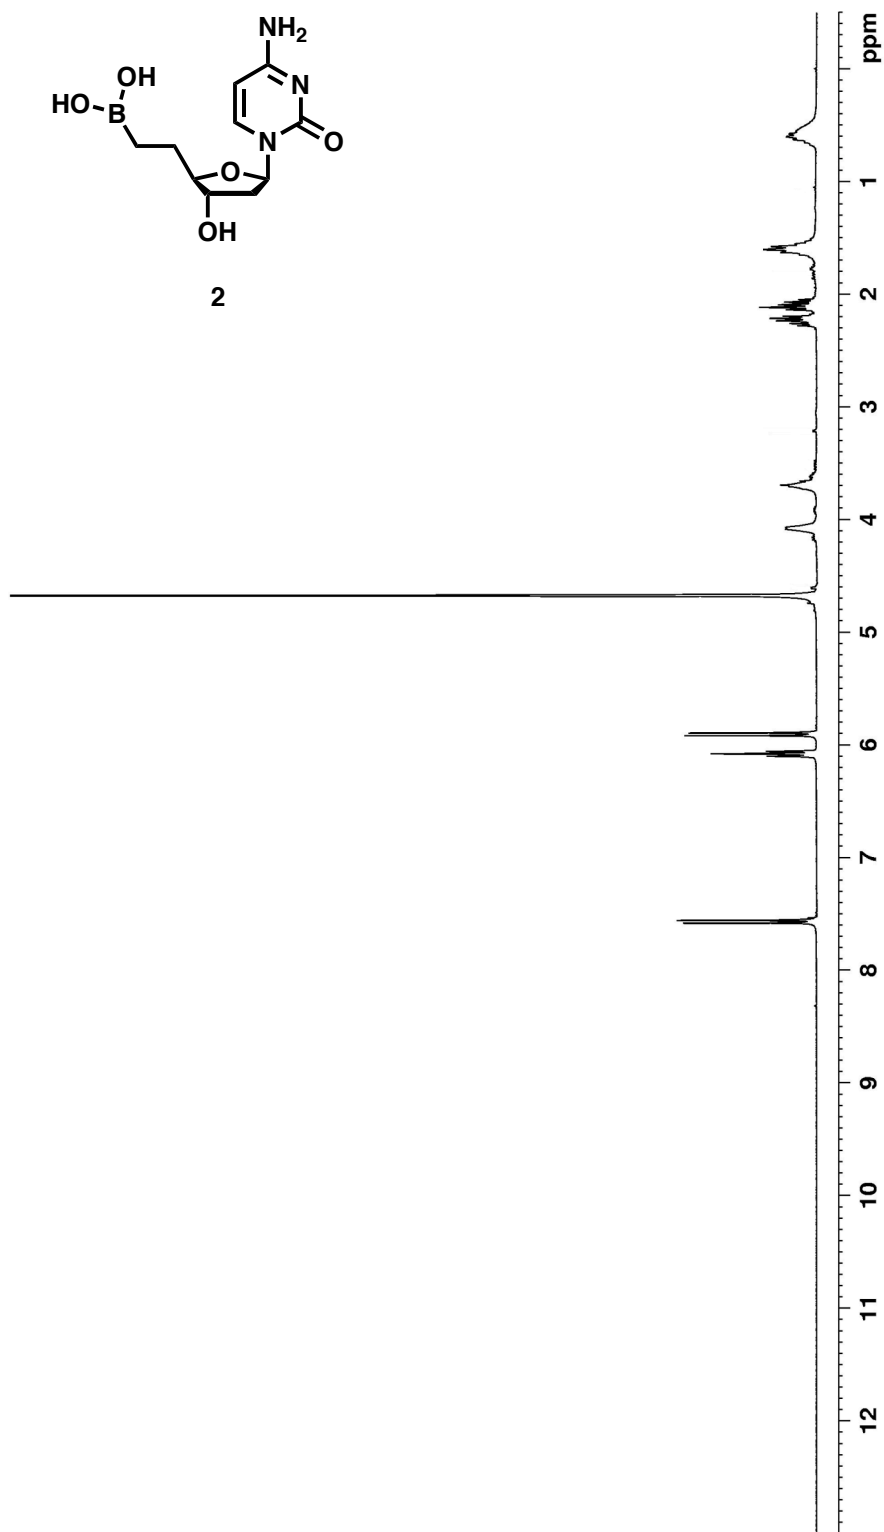



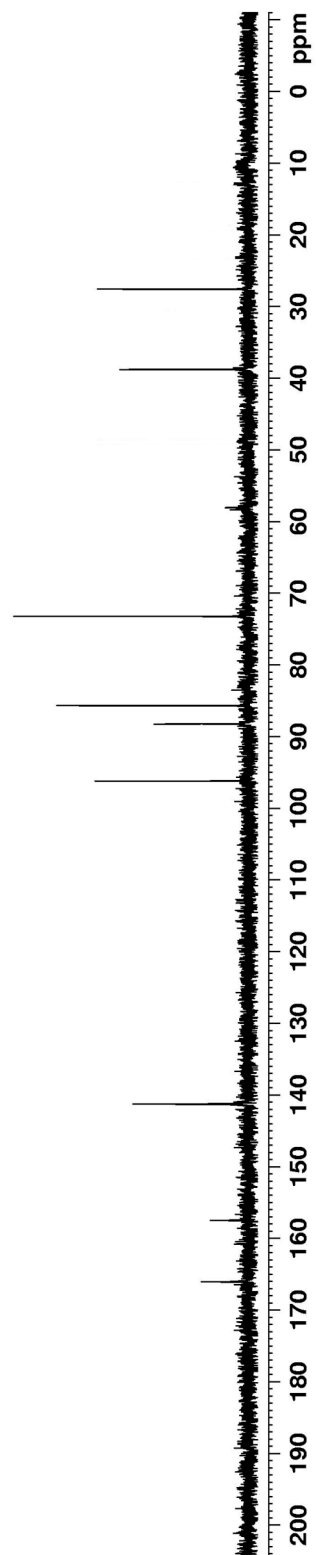

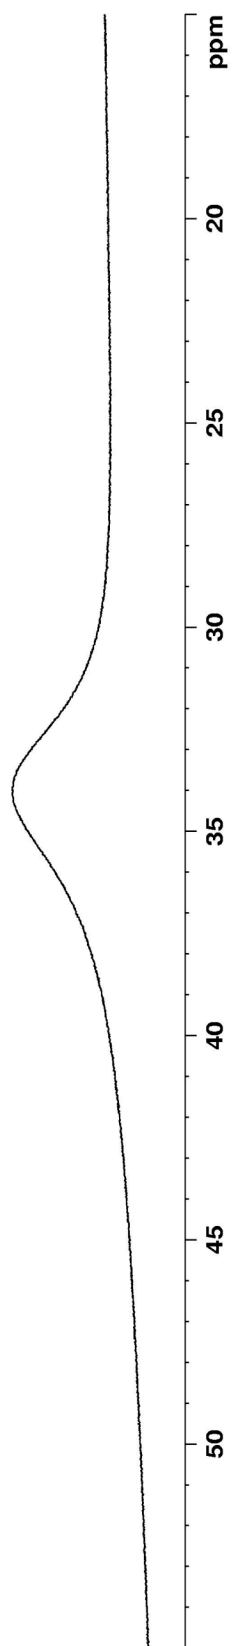

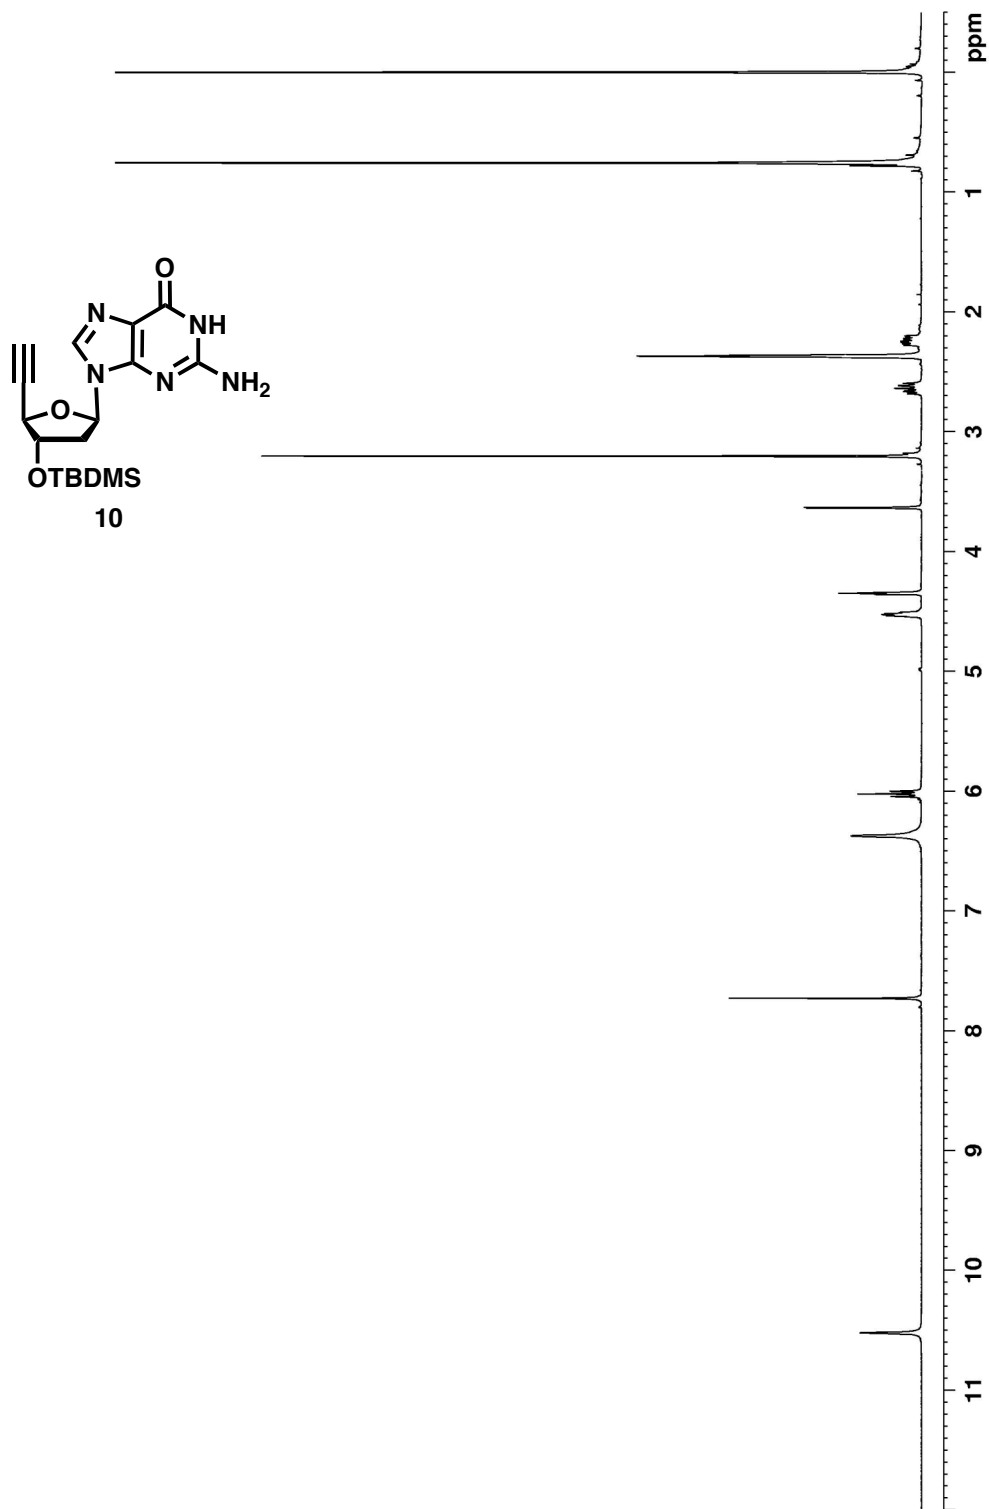

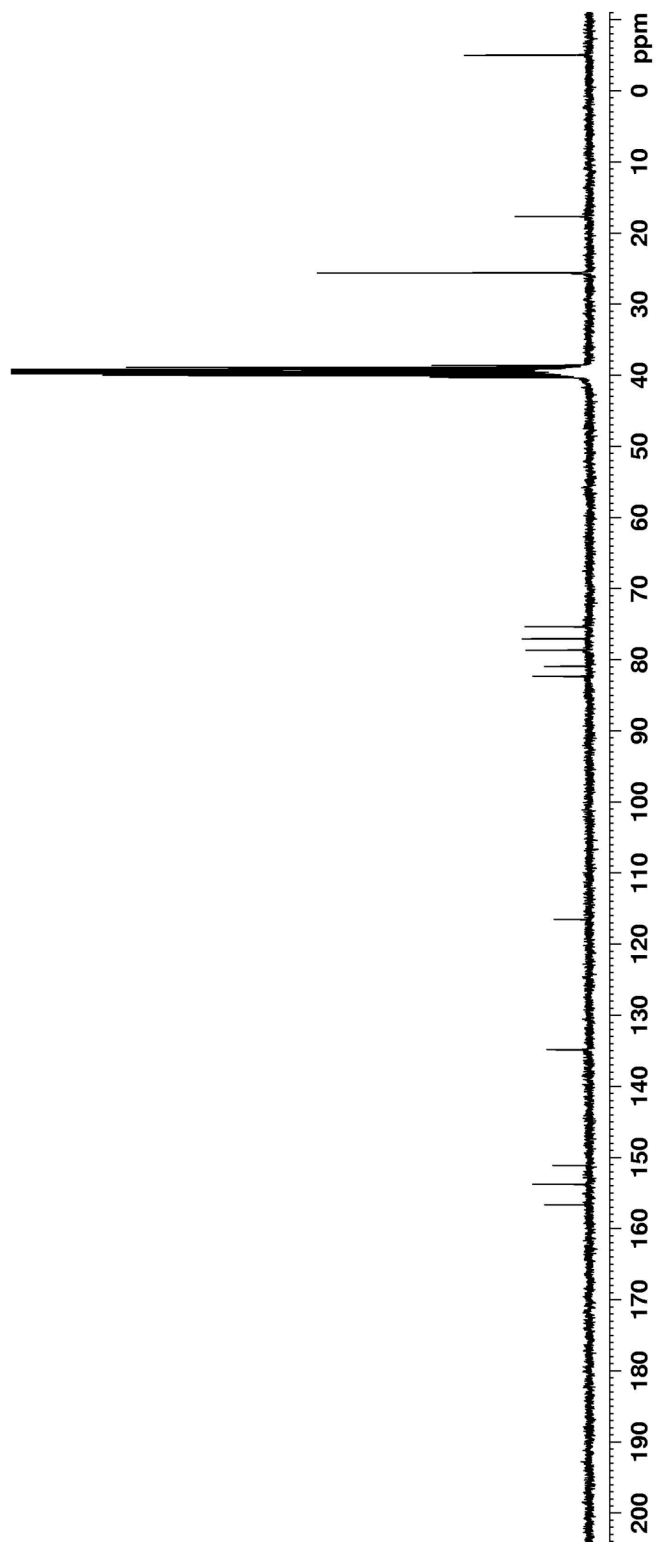

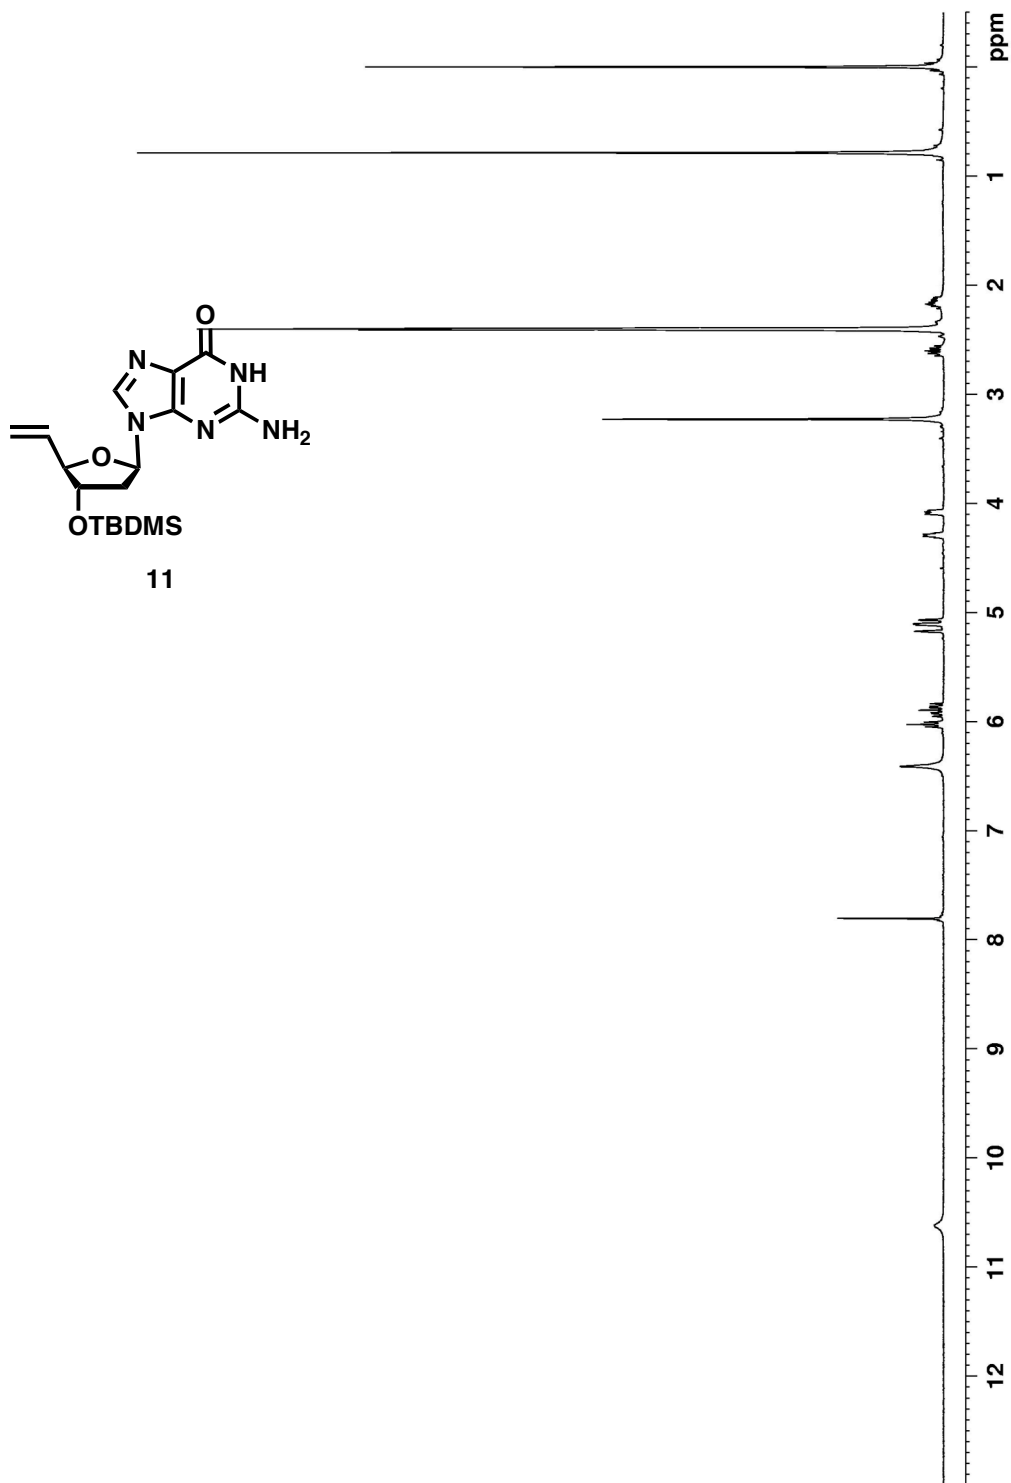

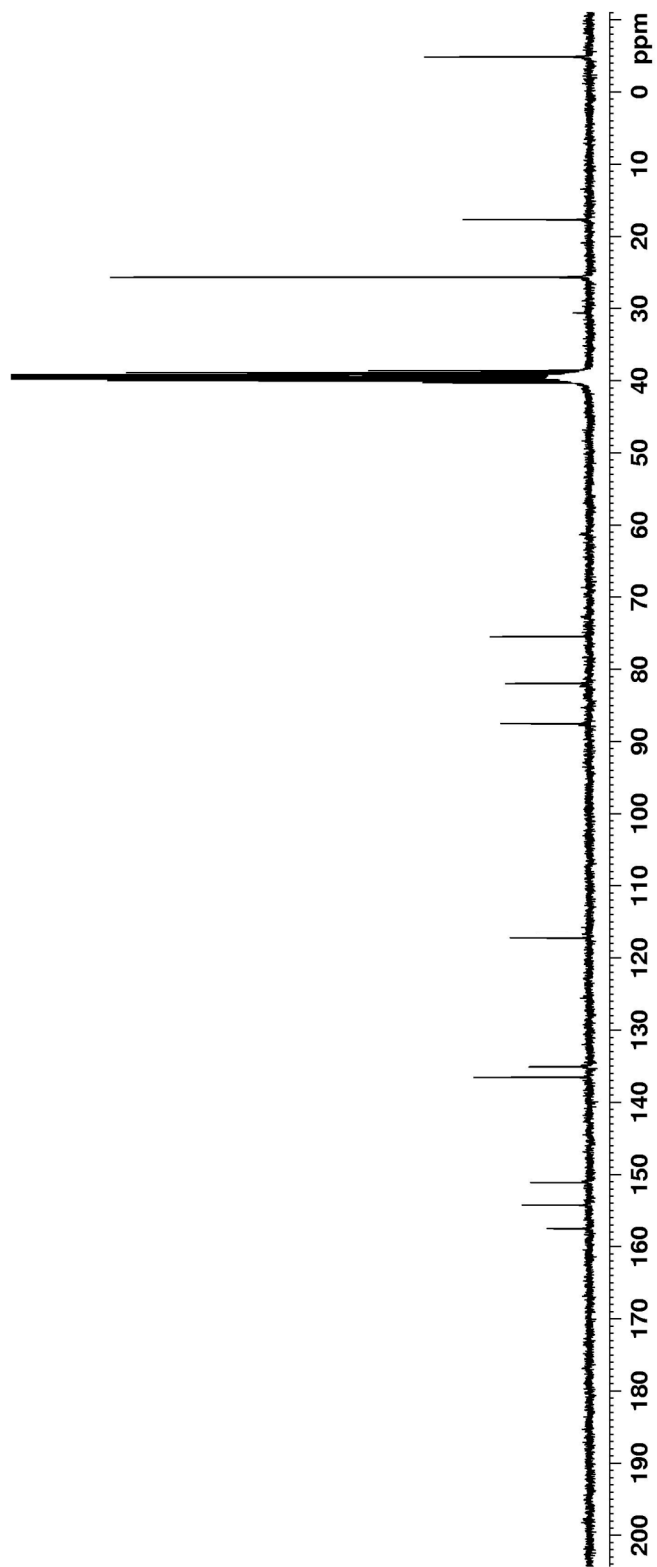

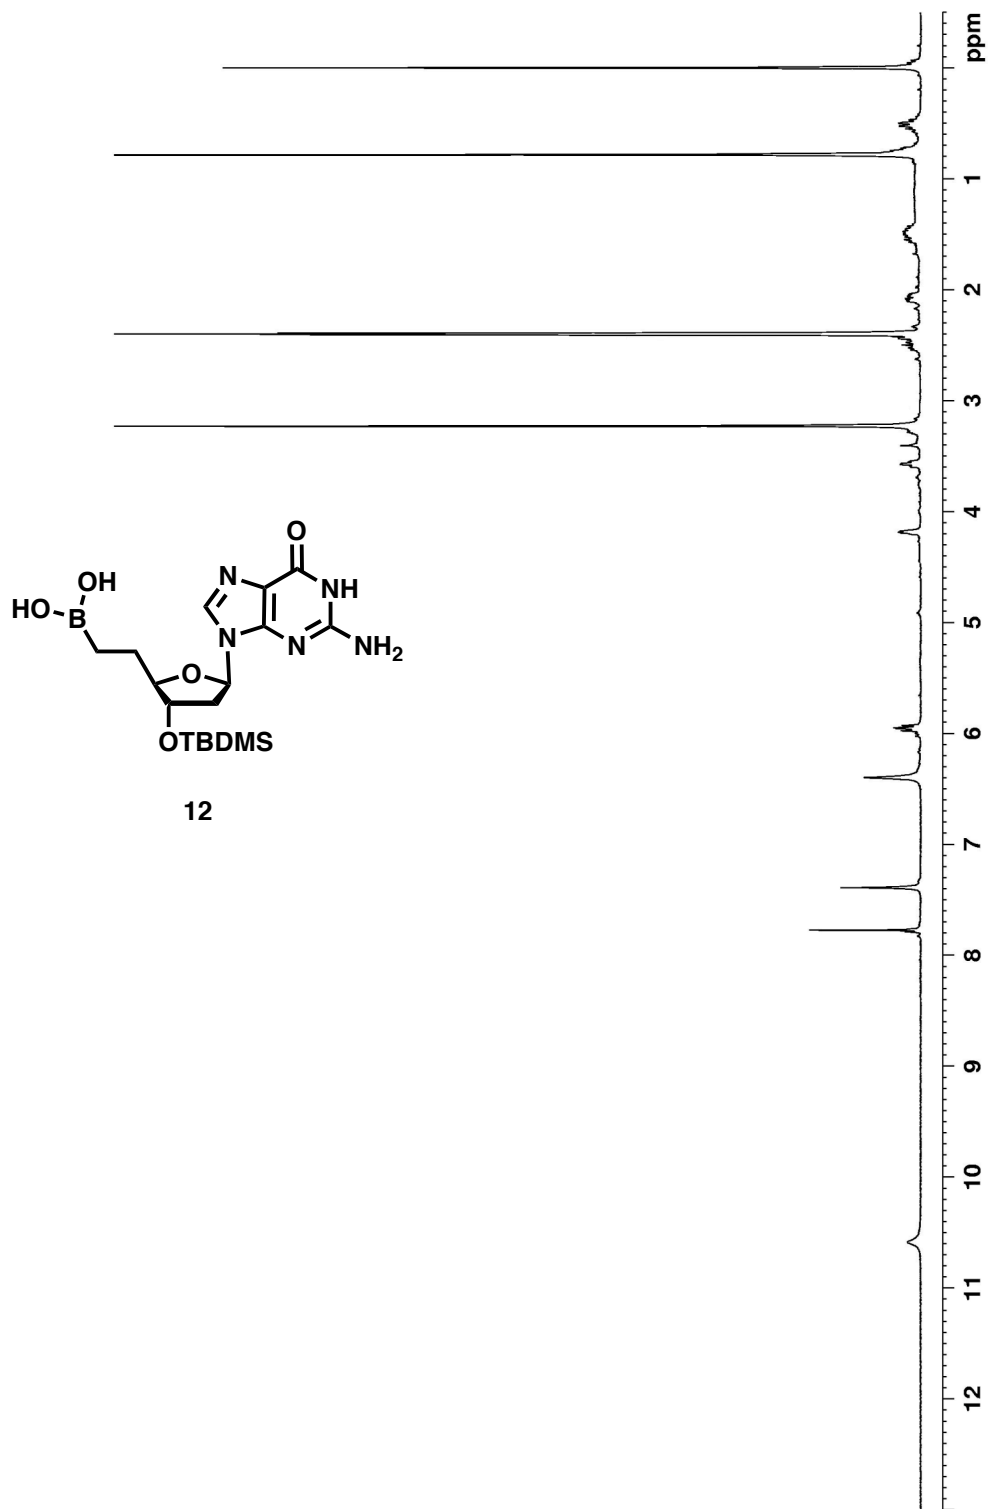

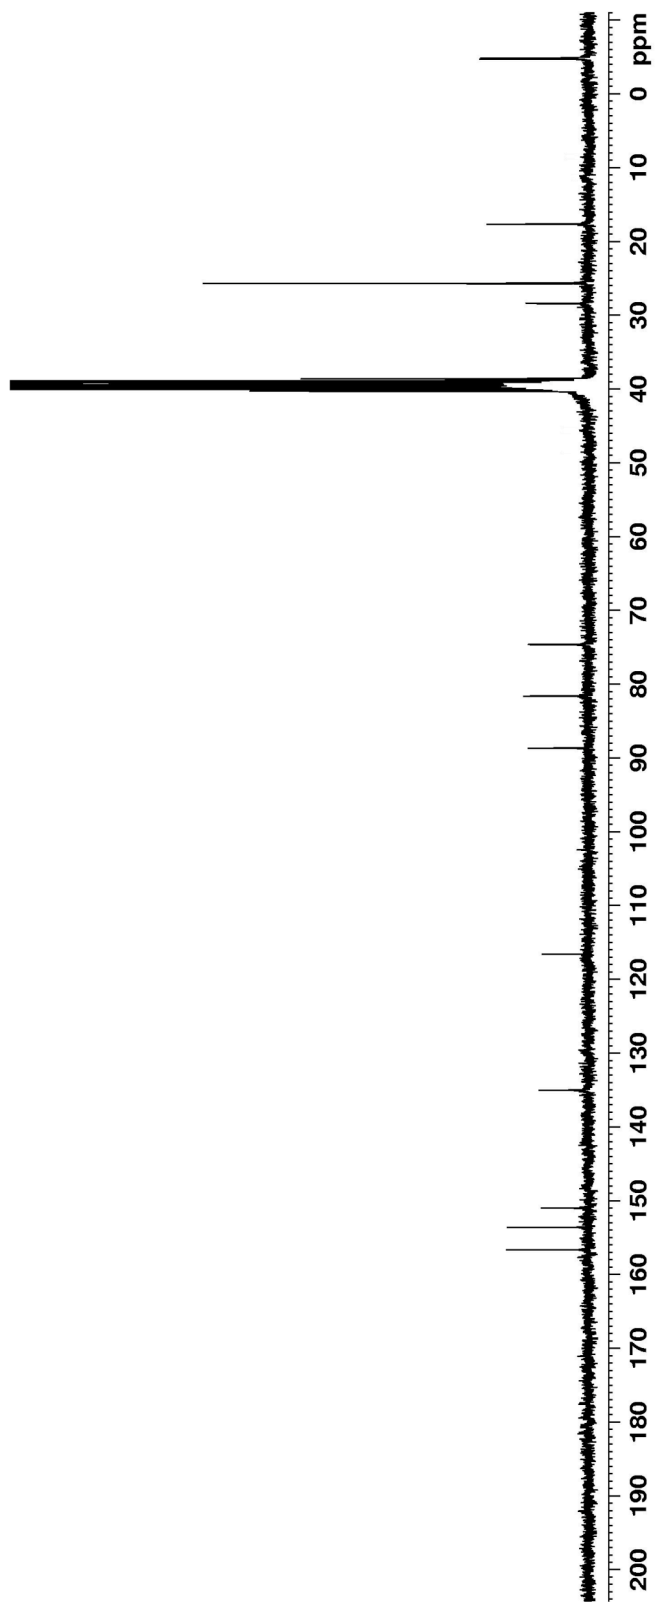



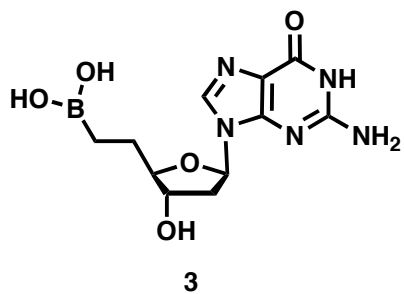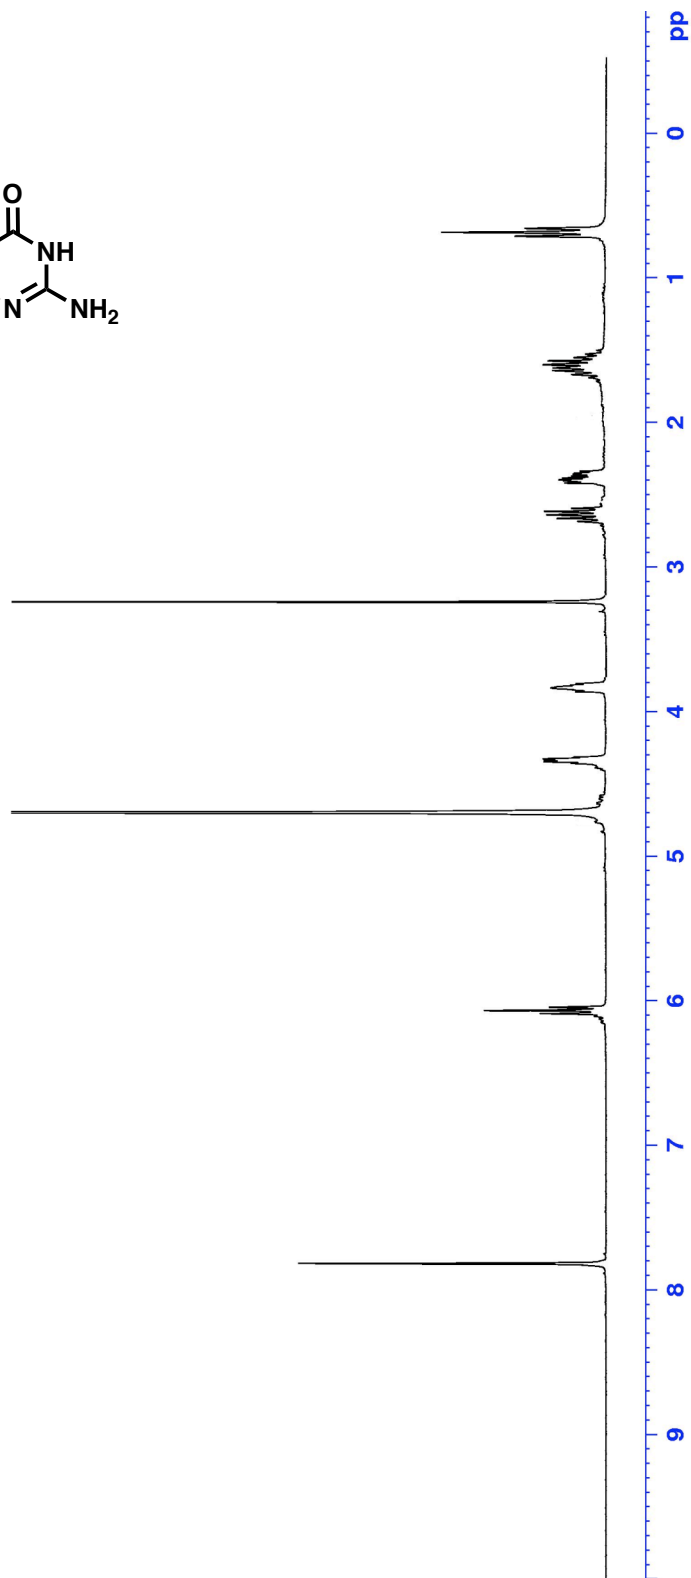

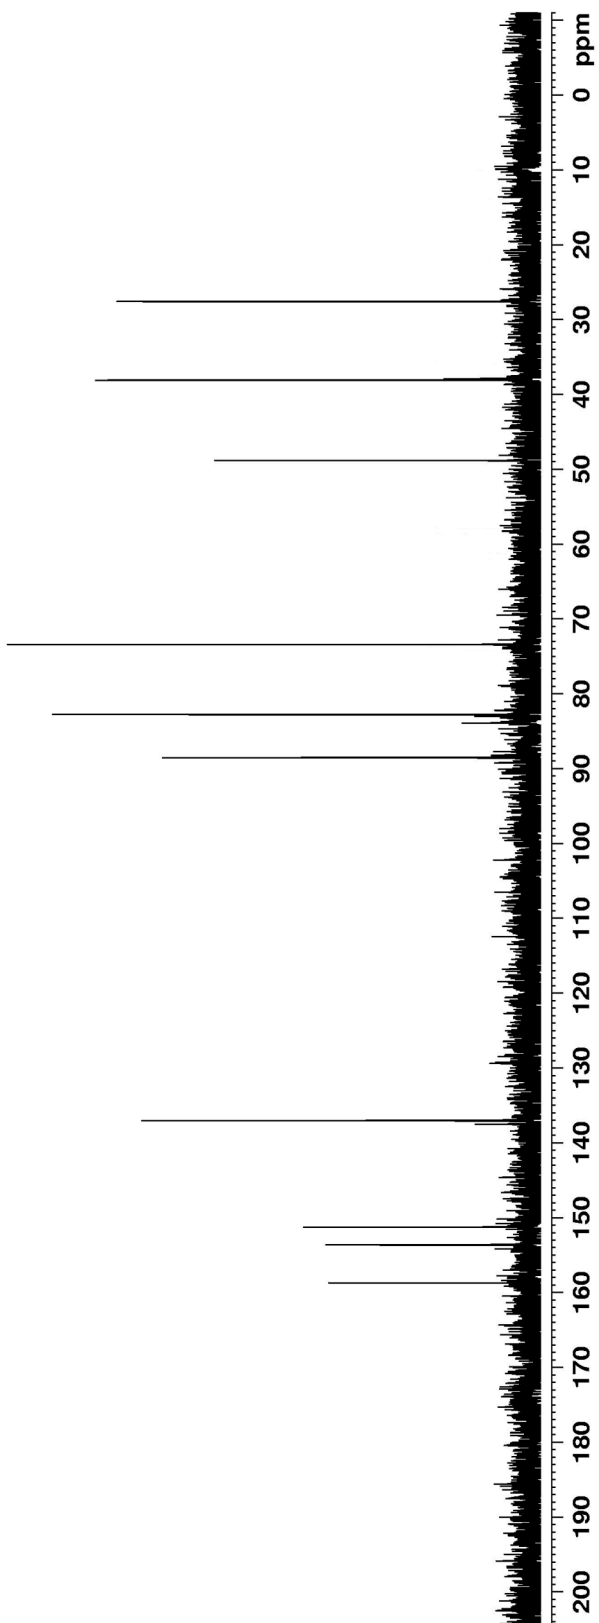

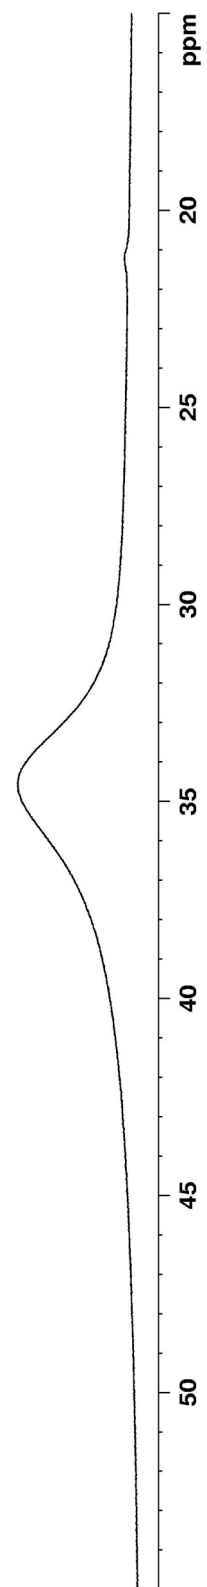

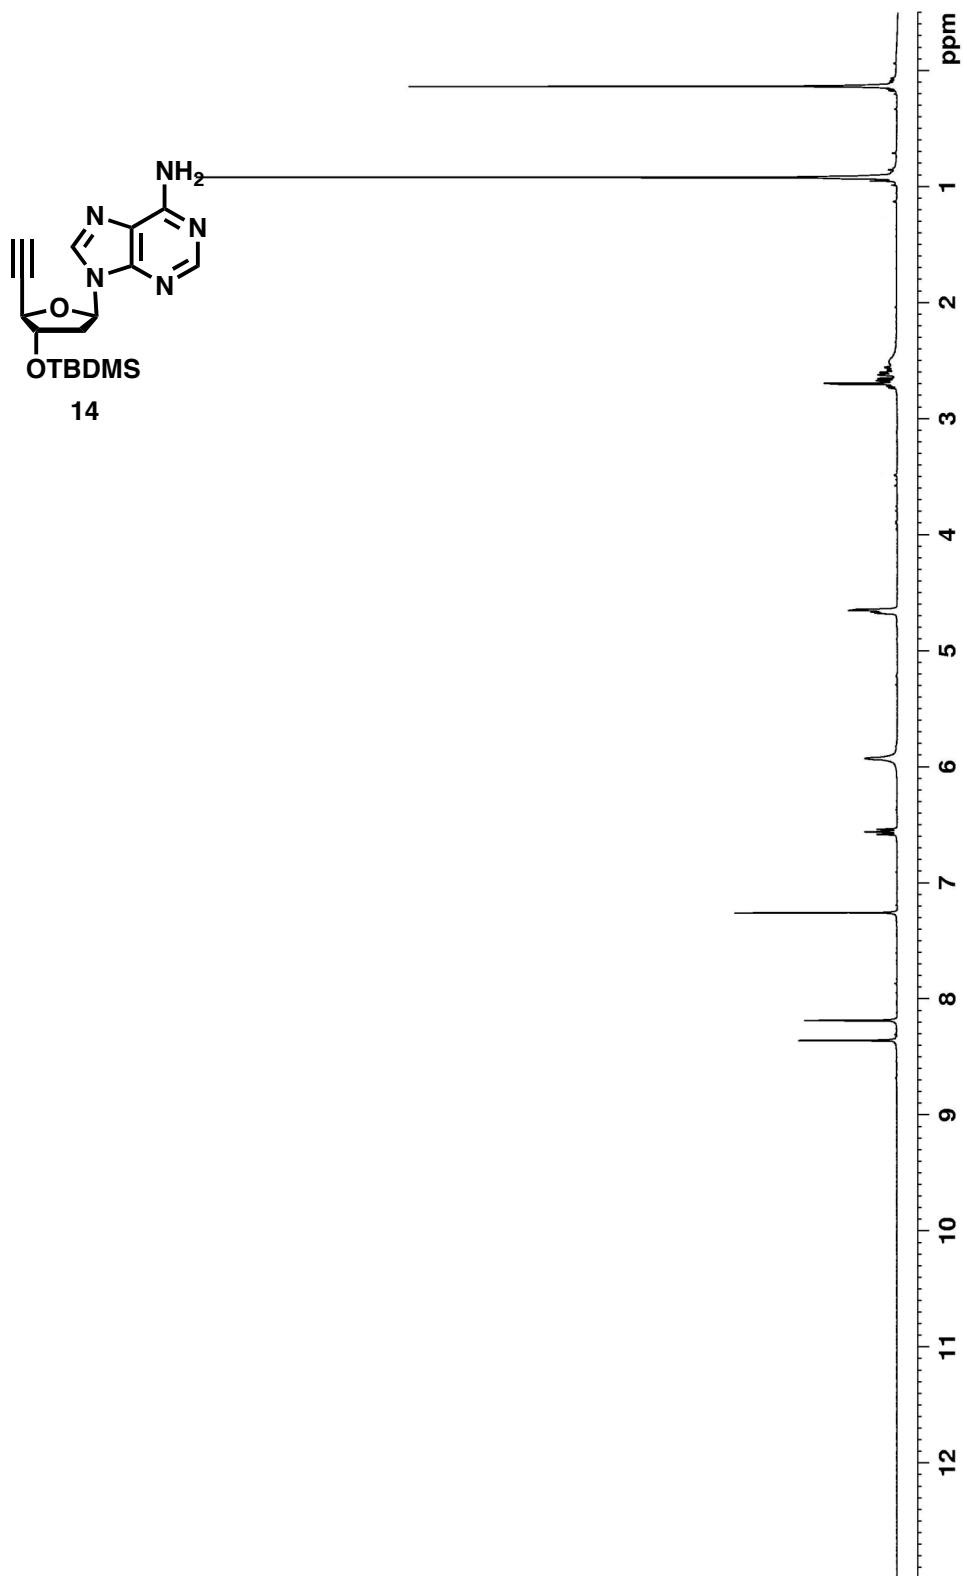

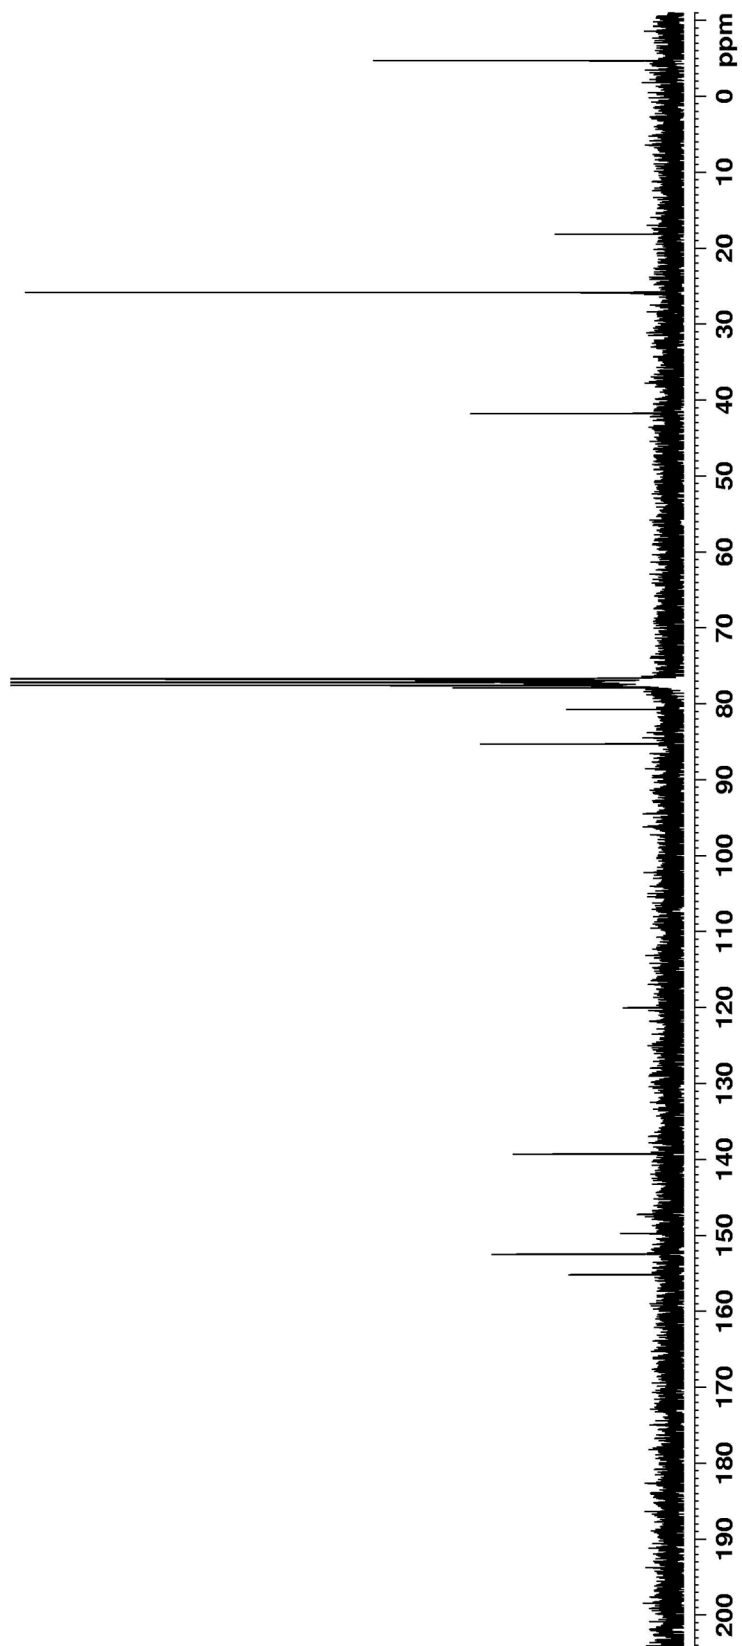

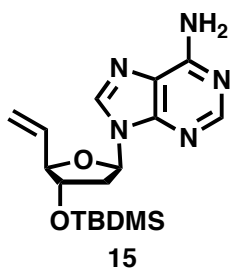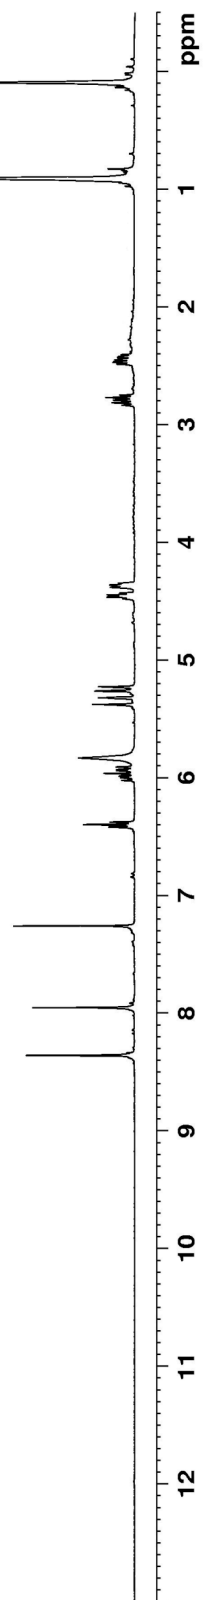

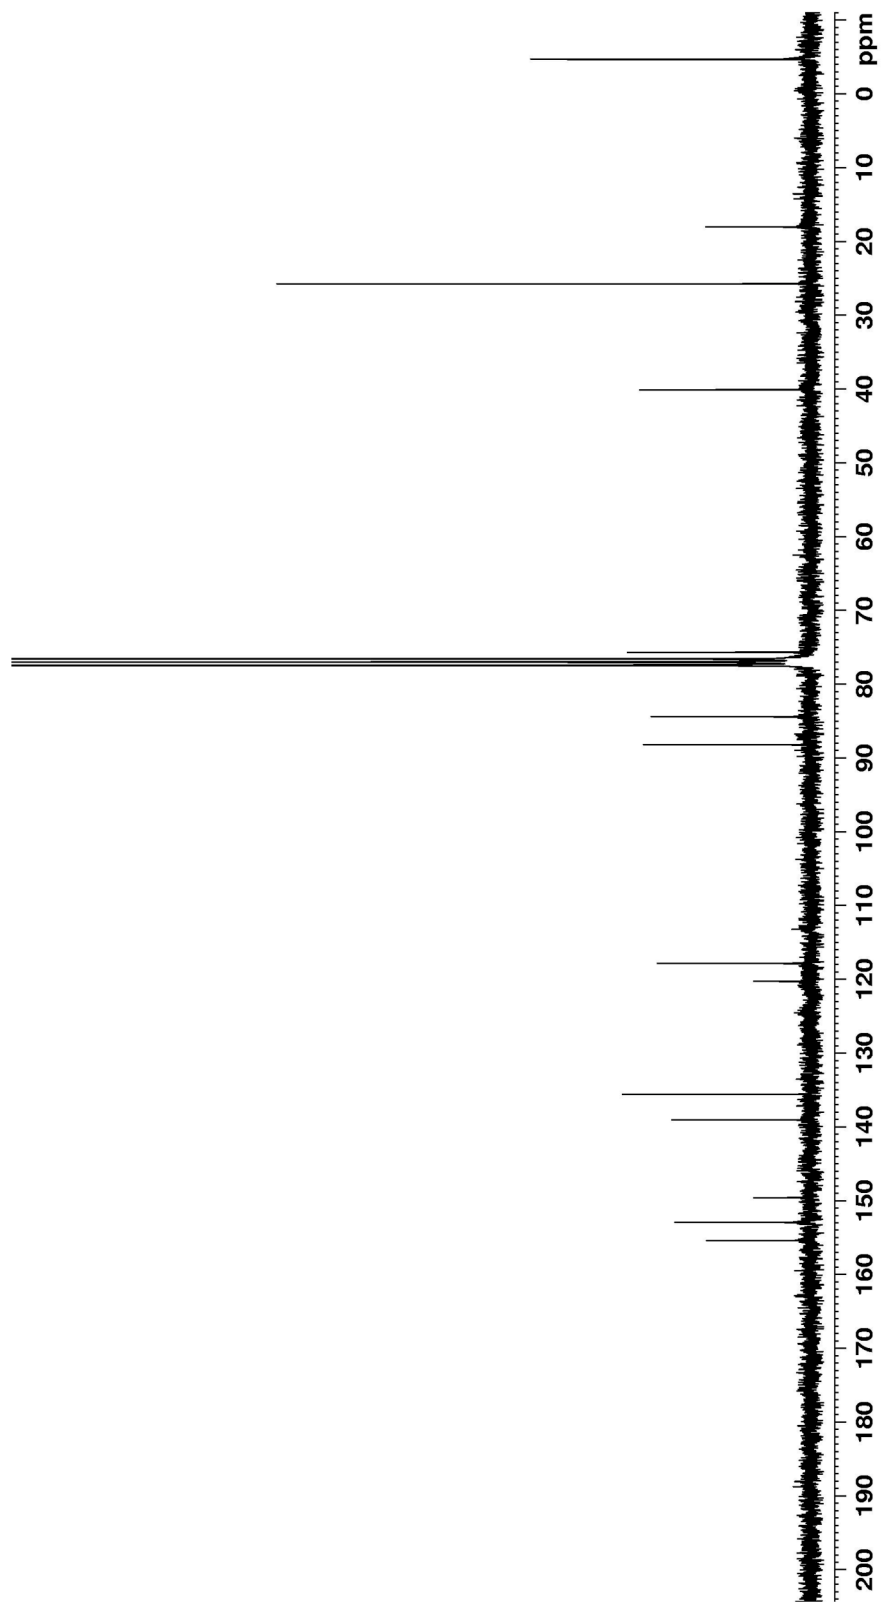

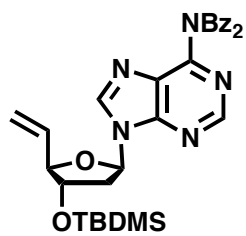

16

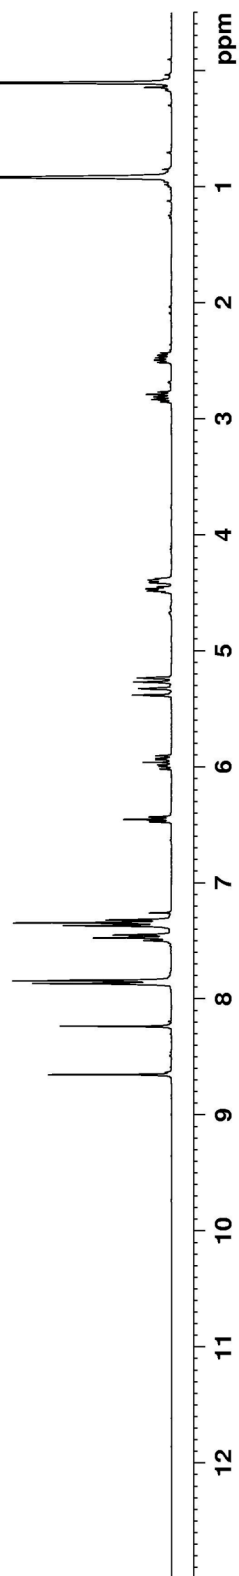



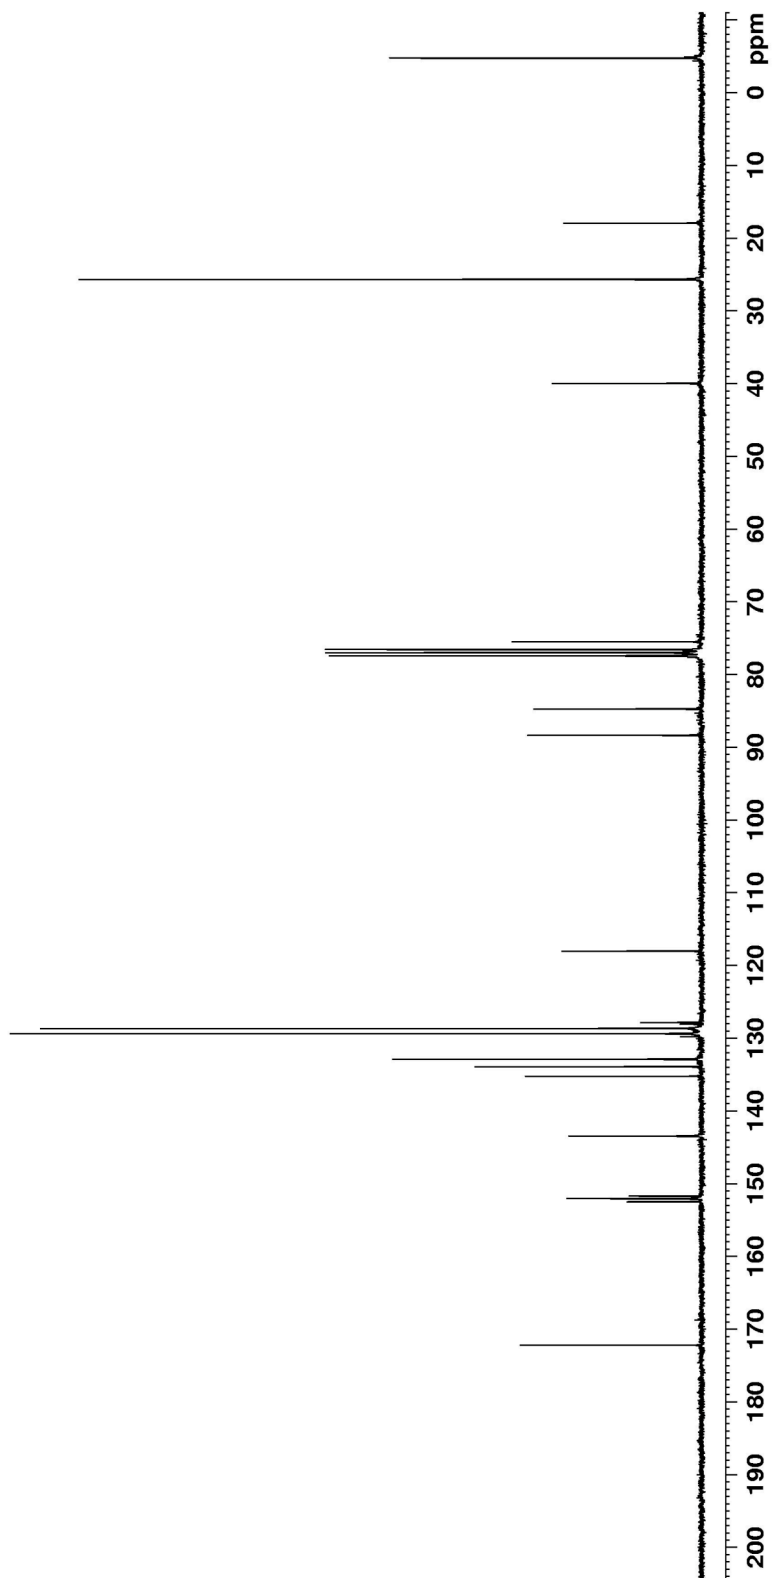

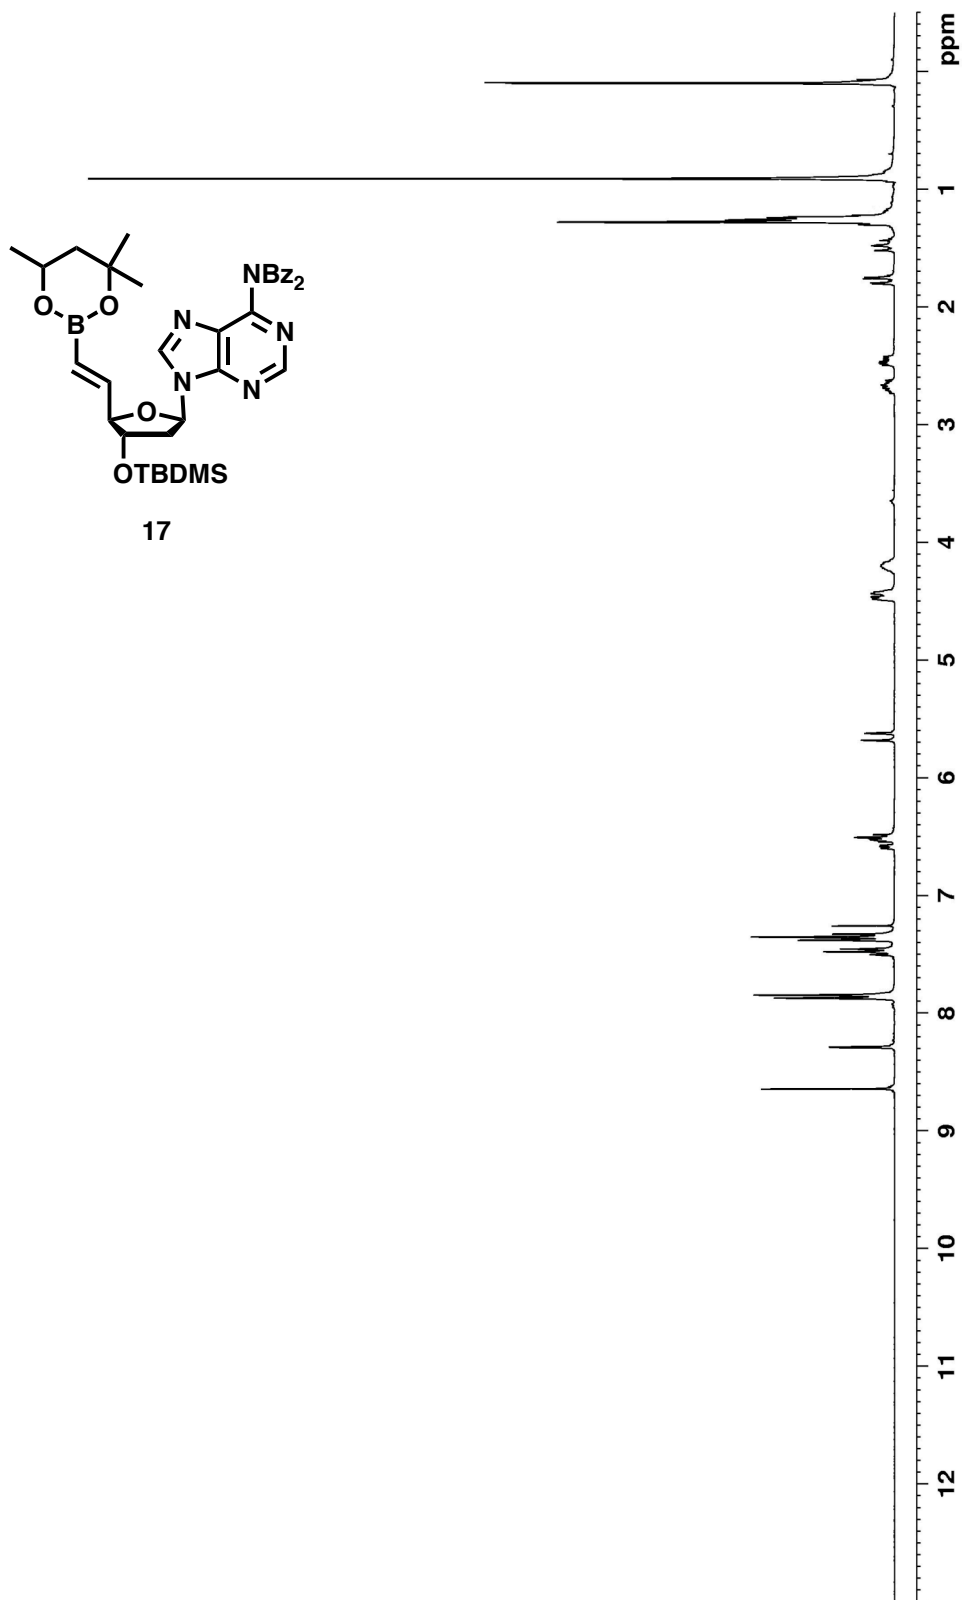

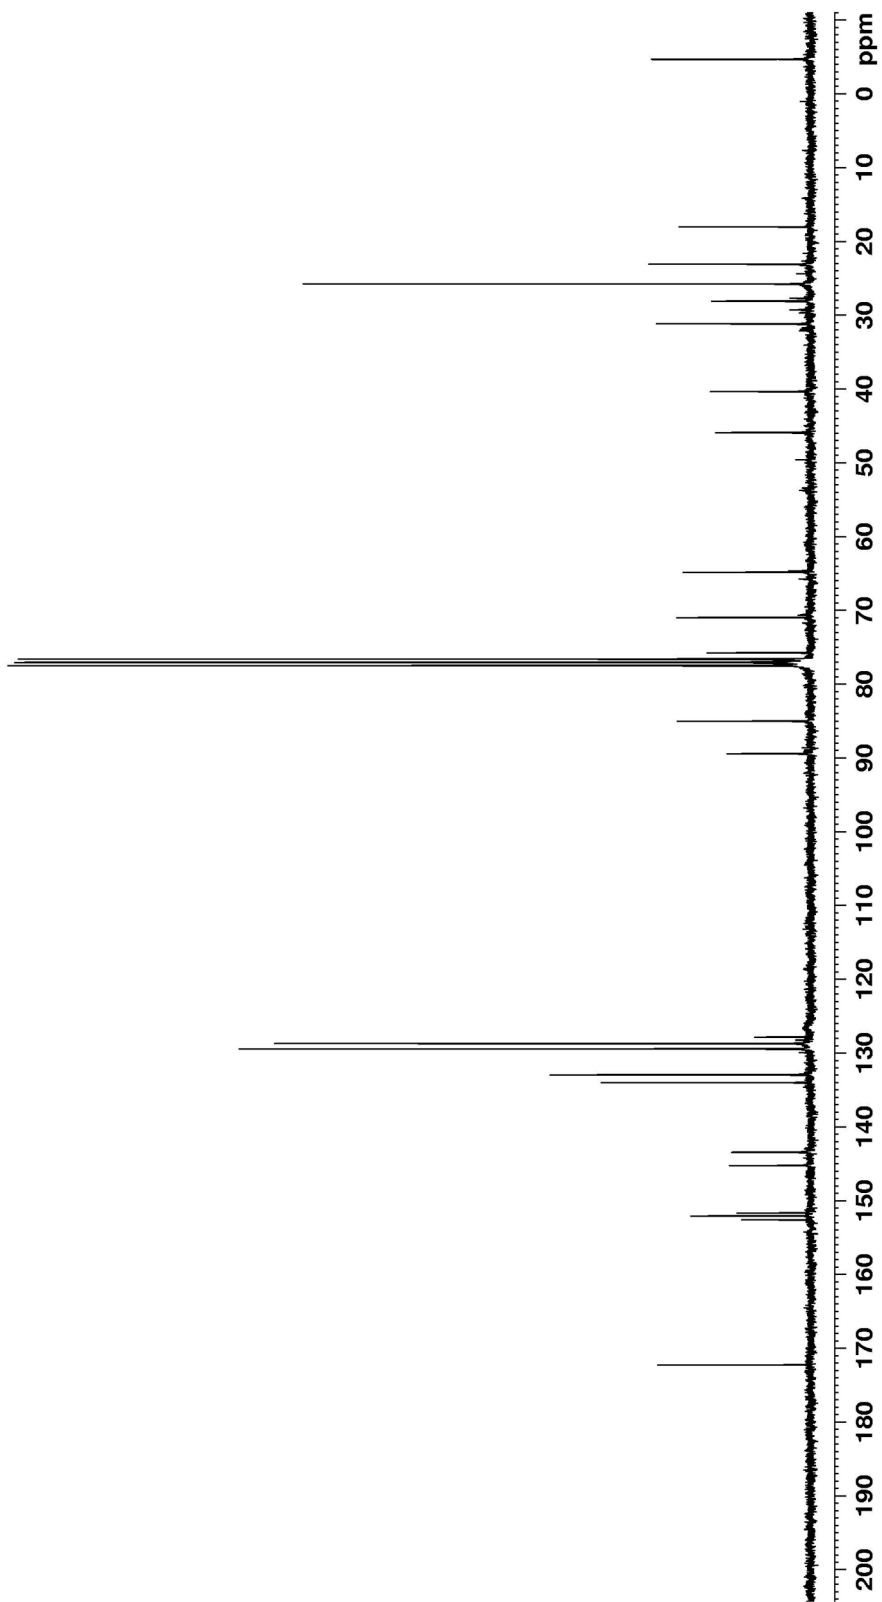

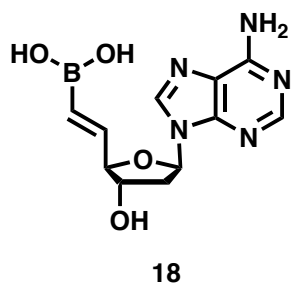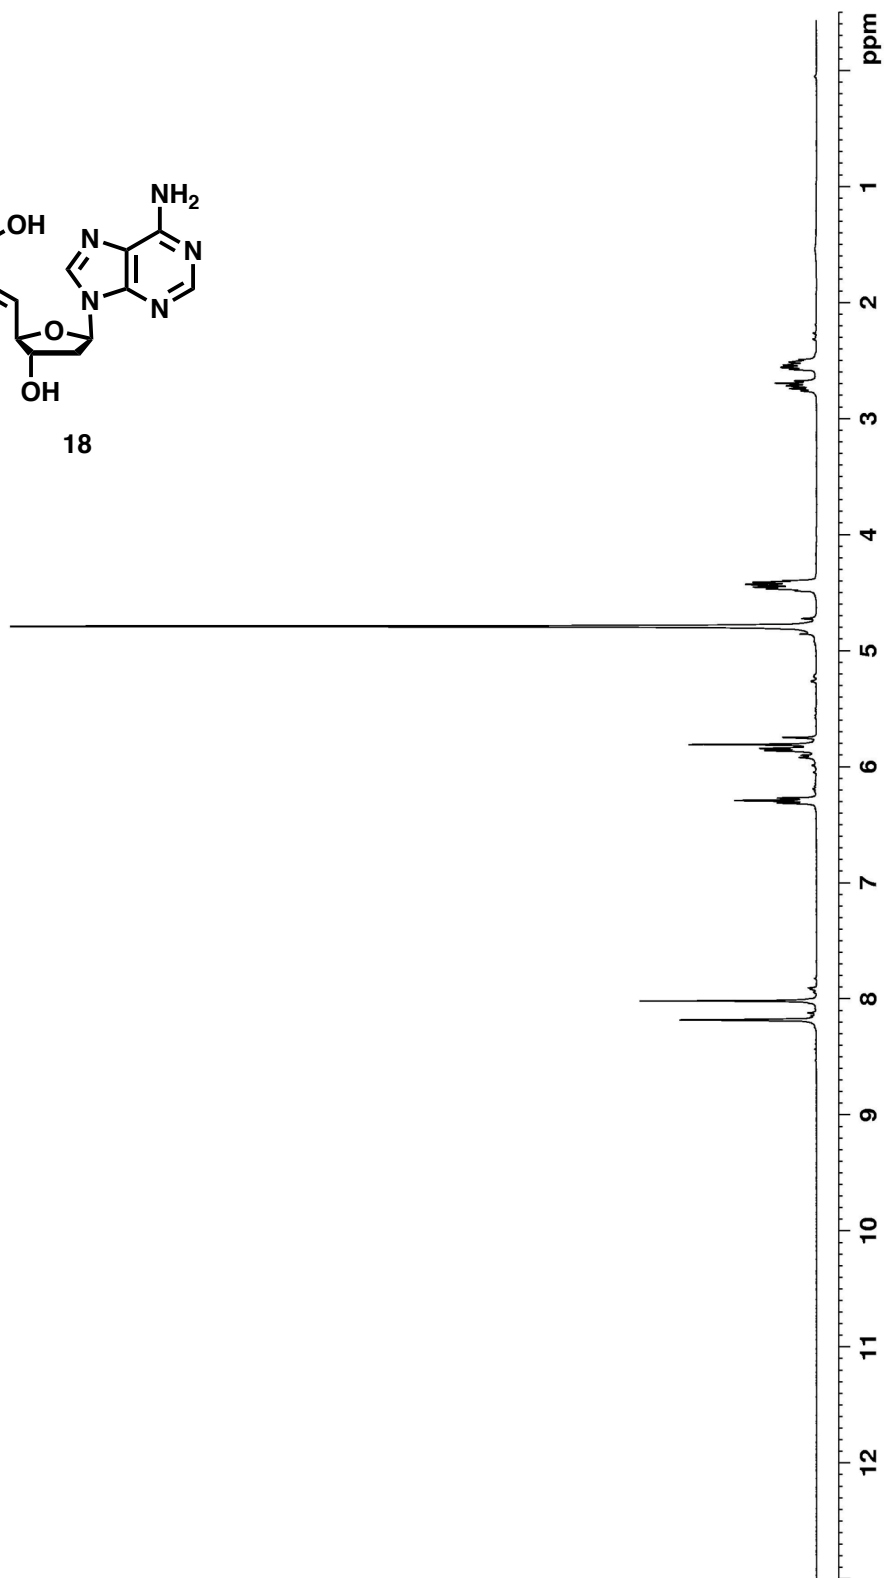

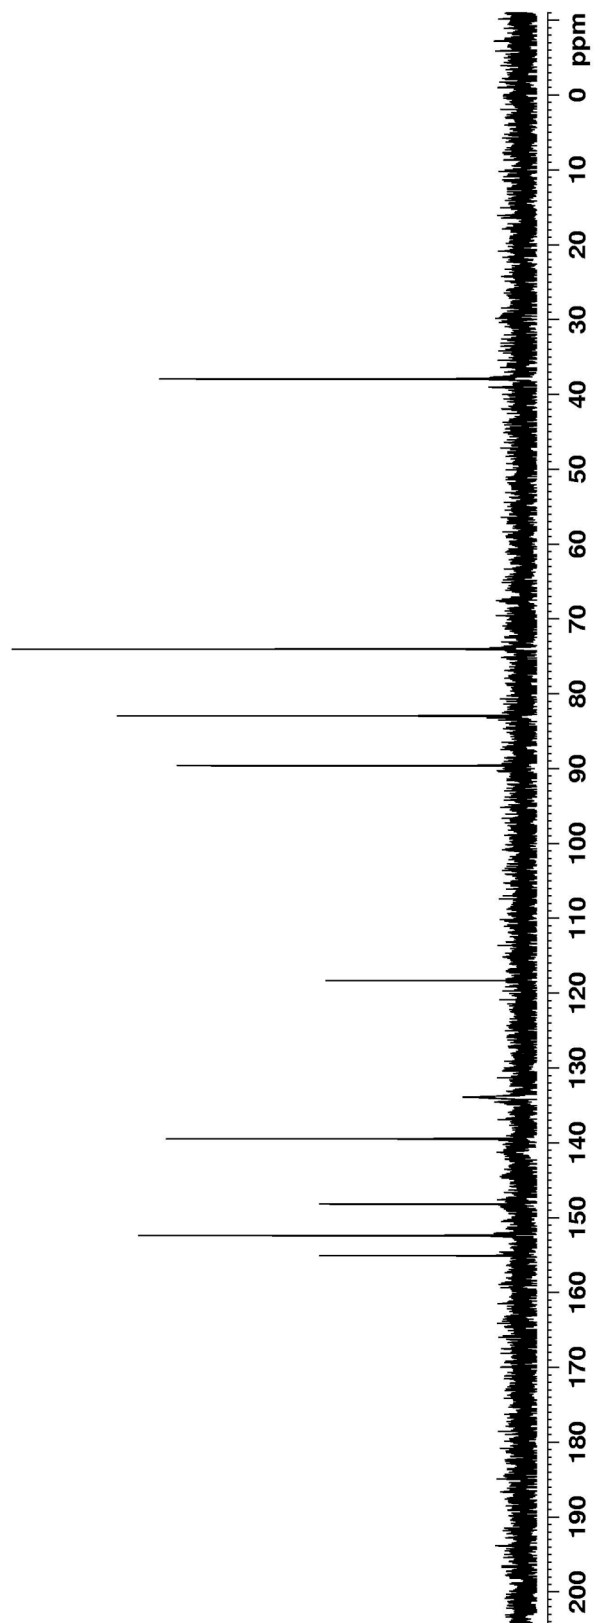

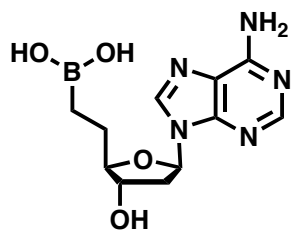

4

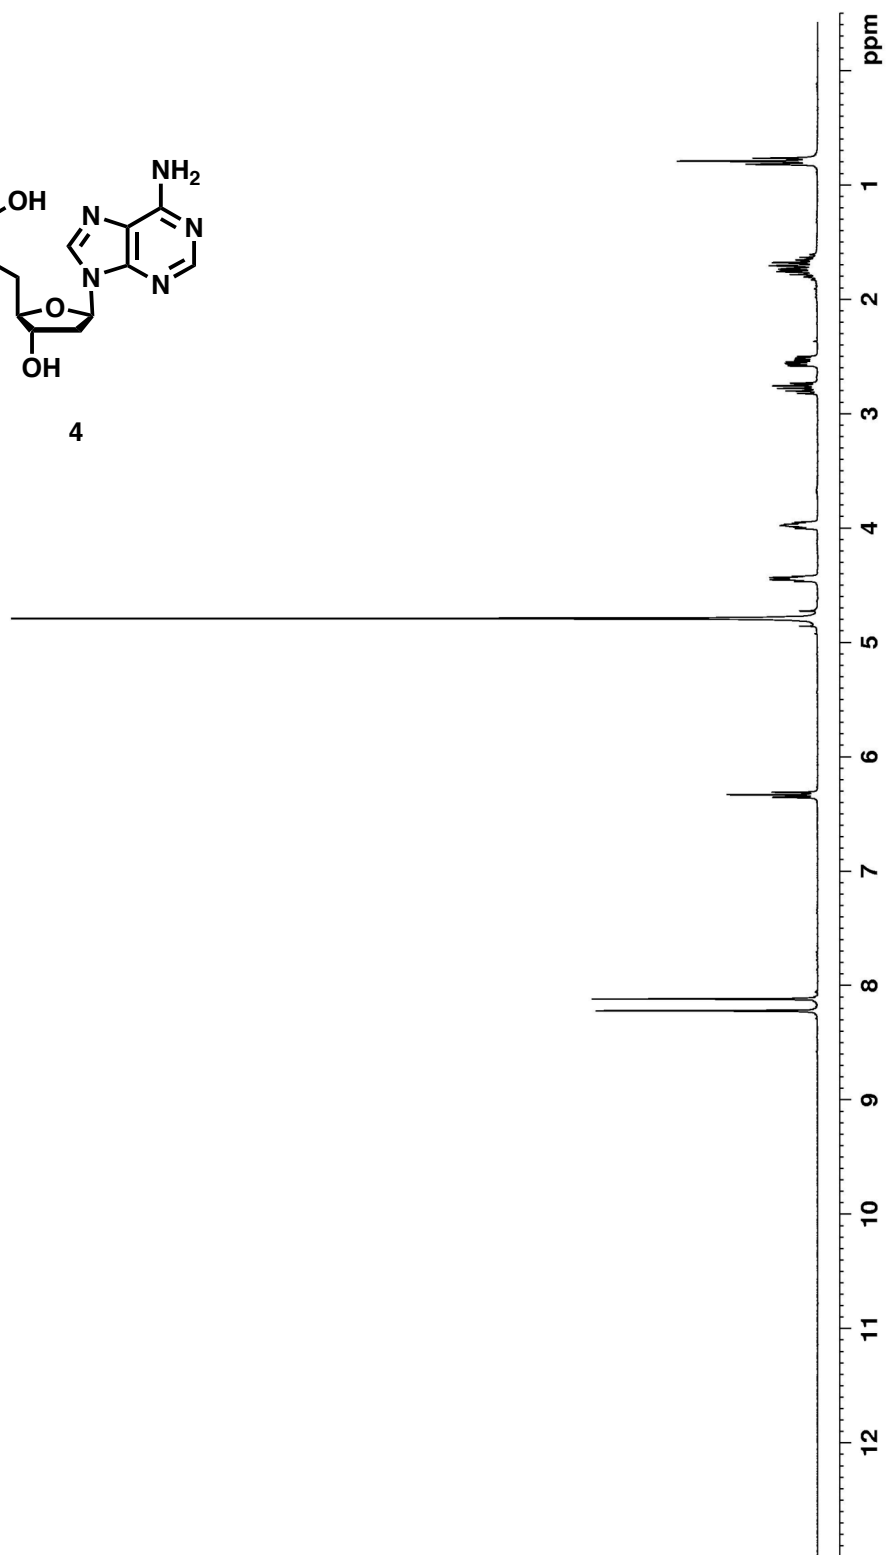

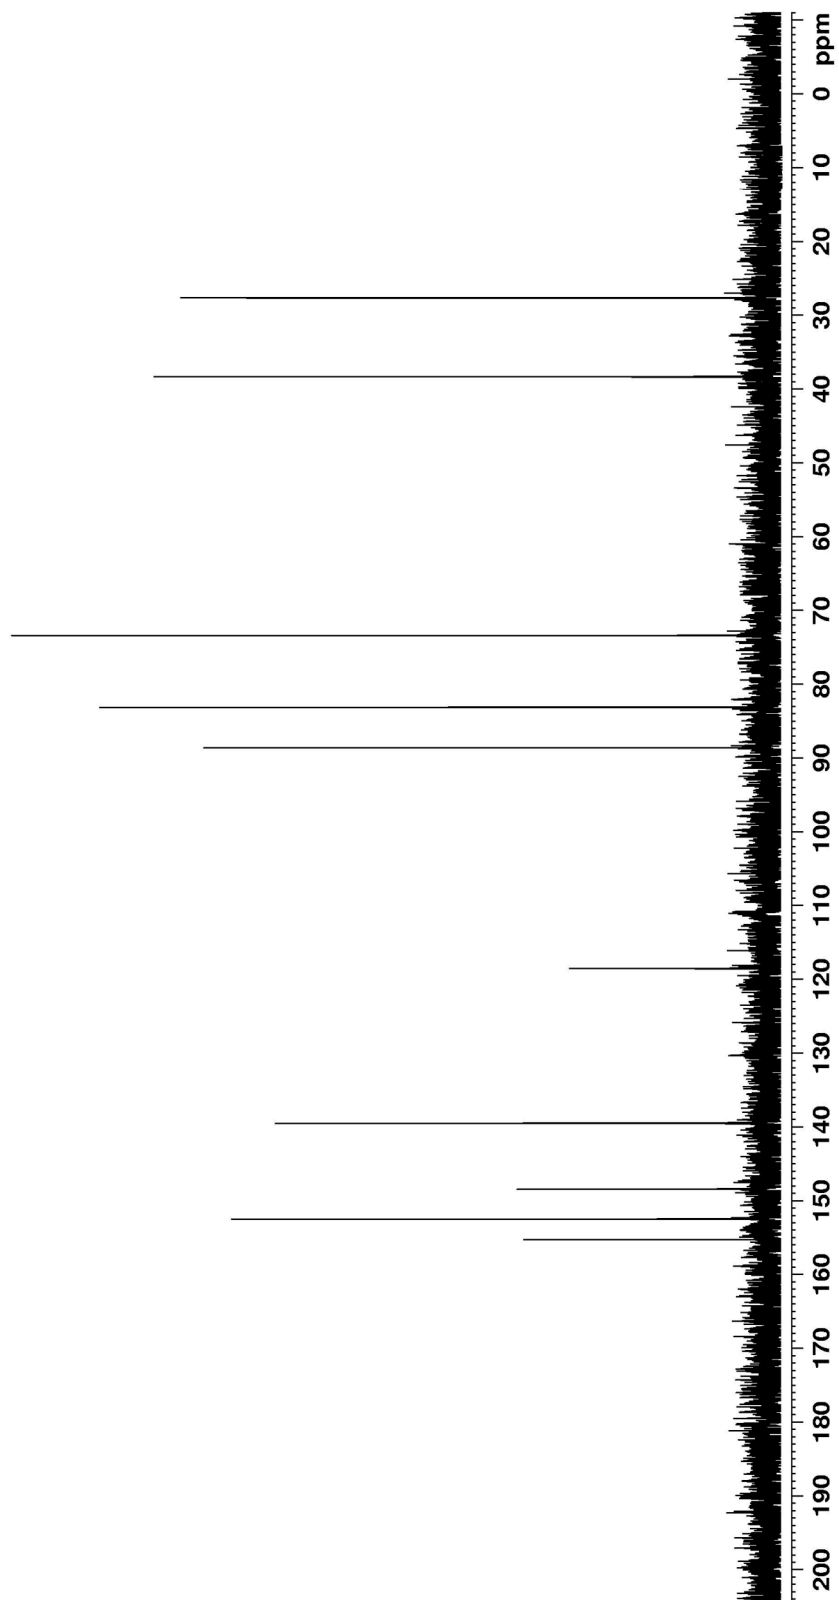

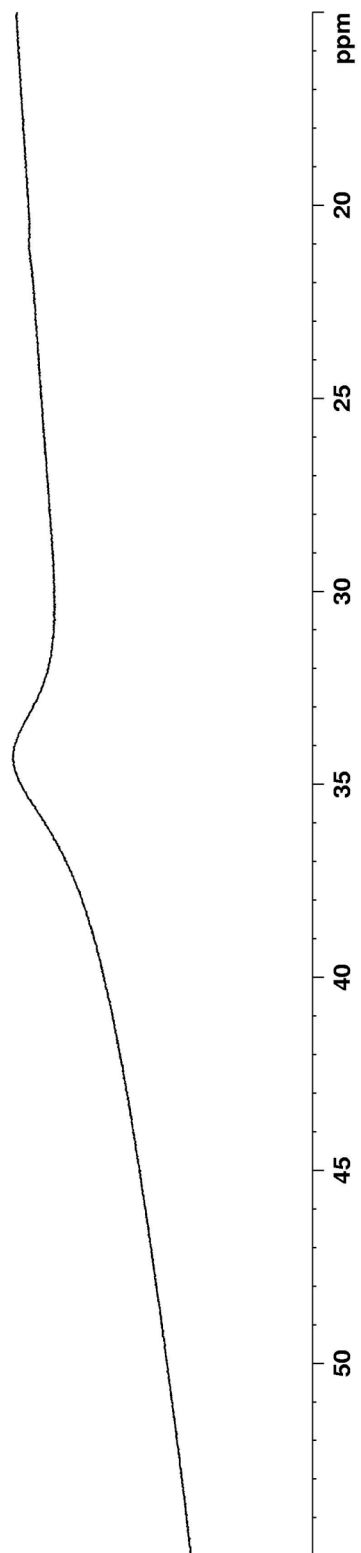

Supplement: b912616c.pdf [file b912616c.pdf]
